# Supplementary material for: Design of Metal-Organic Polymers MIL-53(M3+): Preparation and Characterization of MIL-53(Fe) and Graphene Oxide Composite
Source: MDPI journal article supplement (doi:10.3390/cryst11111281), 2021-10-22
Supplement: s1 [file s1]

## Supplementary Materials

# Design of Metal-Organic Polymers MIL-53(M<sup>3+</sup>): Preparation and Characterization of MIL-53(Fe) and Graphene Oxide Composite

Quang K. Nguyen <sup>1,\*</sup>, Galina M. Kuz'micheva <sup>1,\*</sup>, Evgeny V. Khramov <sup>2</sup>, Roman D. Svetogorov <sup>2</sup>,  
Ratibor G. Chumakov <sup>2</sup> and Thuy T. Cao <sup>3</sup>

- <sup>1</sup> Physico-technological institute, Department of Digital and Additive Technologies ,  
MIREA-Russian Technological University of the Ministry of Education and Science of  
the Russian Federation, Moscow 119454, Russia
- <sup>2</sup> National Research Center «Kurchatov Institute», Moscow 123182,  
Russiaevxramov@gmail.com (E.V.K.); rdsvetov@gmail.com (R.D.S.);  
ratibor.chumakov@gmail.com (R.G.C.)
- <sup>3</sup> Department of Vehicle and Energy Engineering, Phenikaa University, Yen Nghia, Ha-  
Dong District,  
12116 Hanoi, Vietnam; thuy.caothi@phenikaa-uni.edu.vn
- \* Correspondence: quangnguyenke89@gmail.com (Q.K.N.); galina\_kuzmicheva@list.ru  
(G.M.K.)

**Citation:** Nguyen, Q.K.;  
Kuz'micheva, G.M.; Khramov, E.V.;  
Svetogorov, R.D.; Chumakov, R.G.;  
Cao, T.T. Design of Metal-Organic  
Polymers MIL-53 (M<sup>3+</sup>): Preparation  
and Characterization of MIL-53 (Fe)  
and Graphene Oxide Composite.  
*Crystals* **2021**, *11*, 1281. <https://doi.org/10.3390/cryst11111281>

Academic Editor: Alexander Kirillov

Received: 3 October 2021

Accepted: 18 October 2021

Published: 22 October 2021

**Publisher's Note:** MDPI stays  
neutral with regard to jurisdictional  
claims in published maps and  
institutional affiliations.

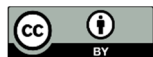

**Copyright:** © 2021 by the authors.  
Submitted for possible open access  
publication under the terms and  
conditions of the Creative Commons  
Attribution (CC BY) license  
(<https://creativecommons.org/licenses/by/4.0/>).

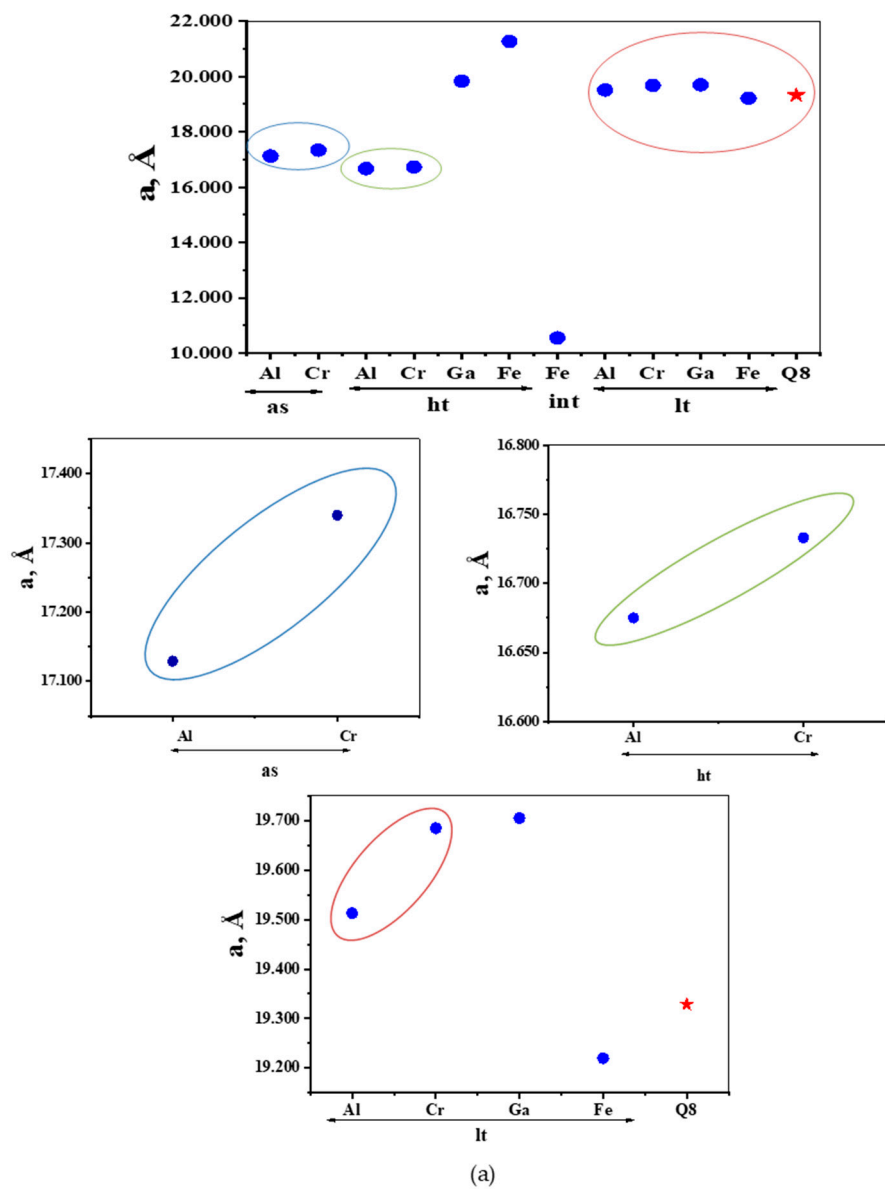

Figure. S1. *Cont.*

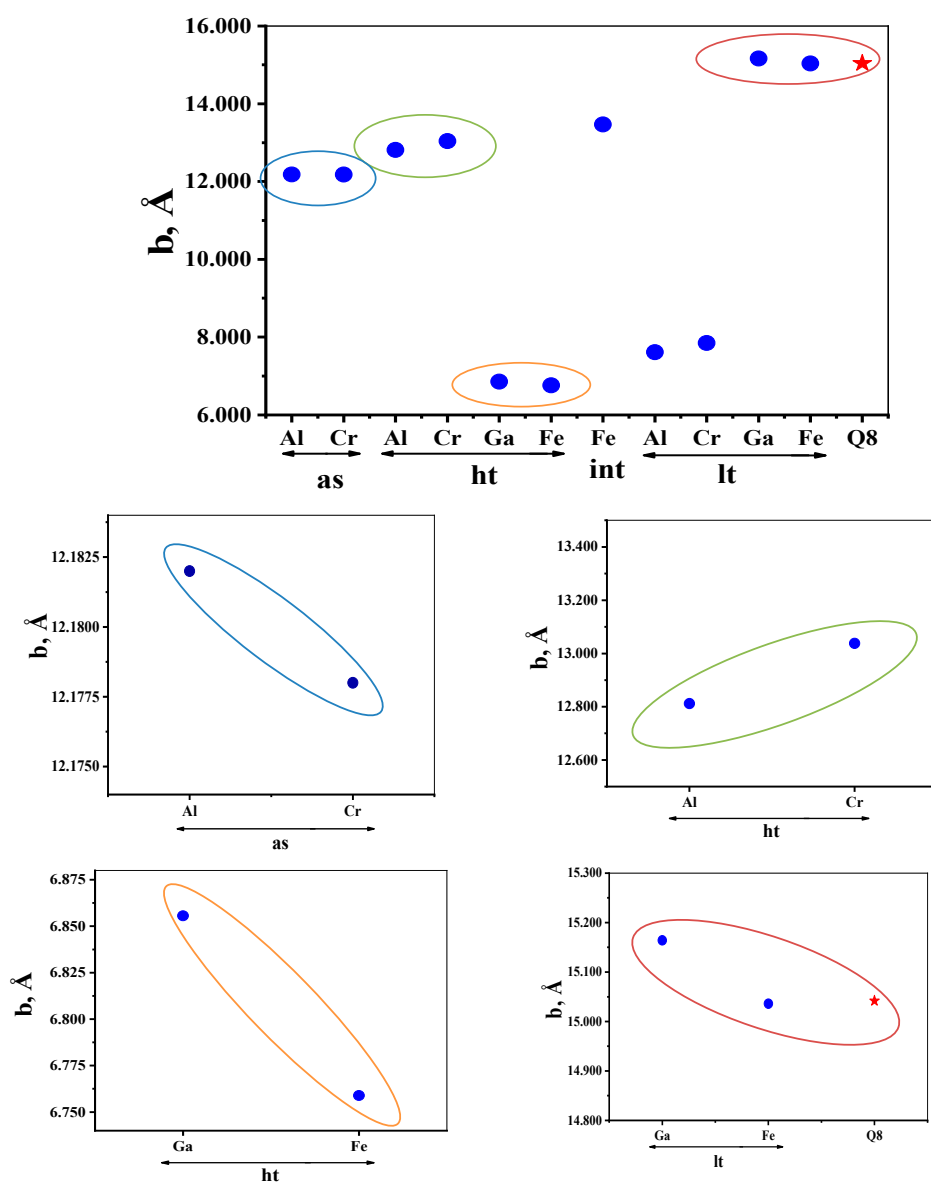

(b)

Figure. S1. *Cont.*

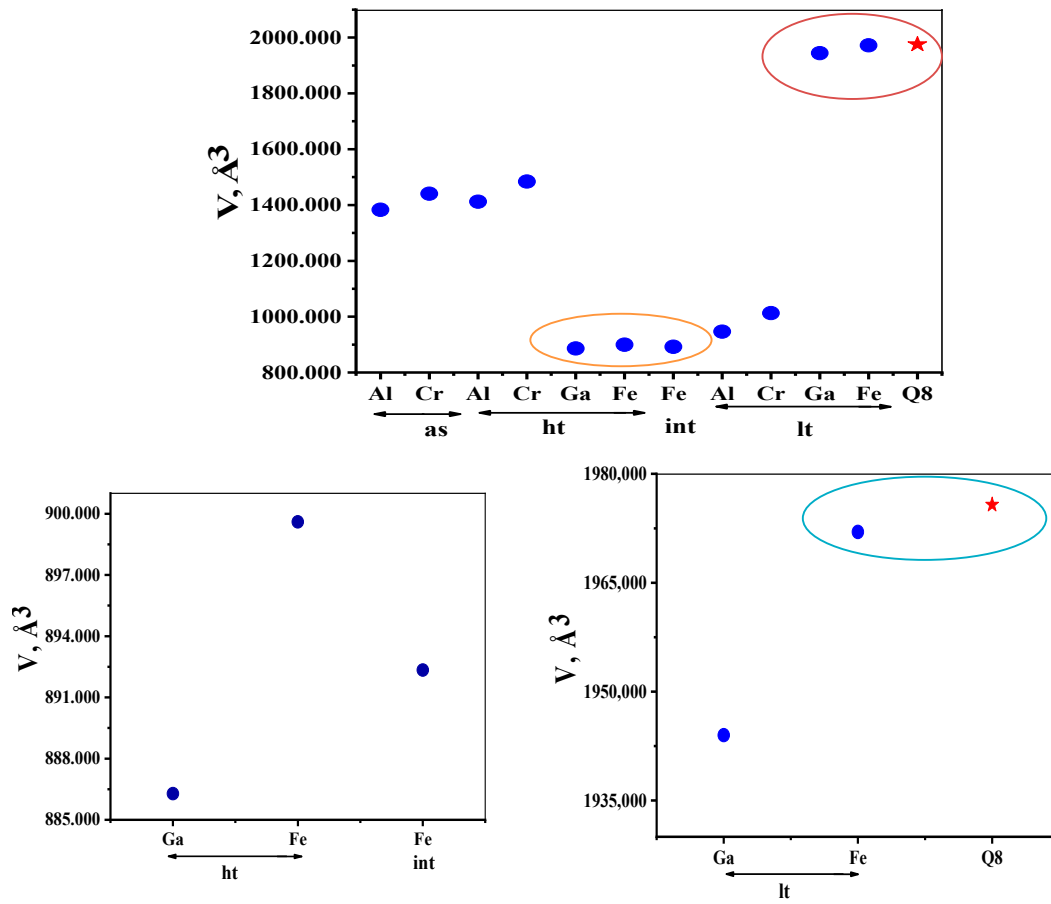

(c)

**Figure S1.** Unit cell parameters  $a$ ,  $\text{\AA}$  (a),  $b$ ,  $\text{\AA}$  (b) and cell volume  $V$ ,  $\text{\AA}^3$  (c) of phases I-VI (Table 1).
